# Supplementary material for: Sex-linked genomic variation and its relationship to avian plumage dichromatism and sexual selection
Source: PubMed Central journal article supplement (PMC4574164; doi:10.1186/s12862-015-0480-4), 2015-09-16

### A. Raw illumina sequencing data

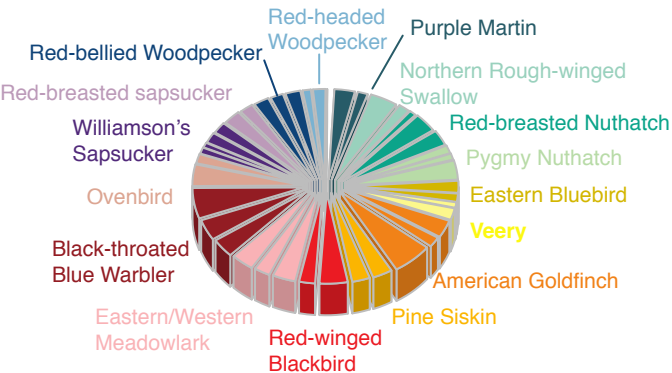

### B. Number of loci from *de novo* assembly

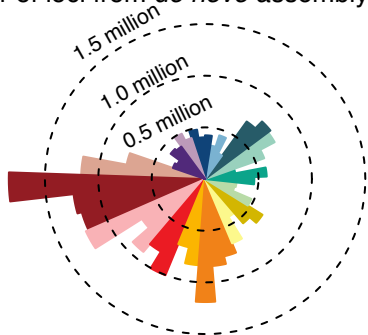

### C. Genomic distribution of RAD loci (Kbp mapped per 1Mbp)

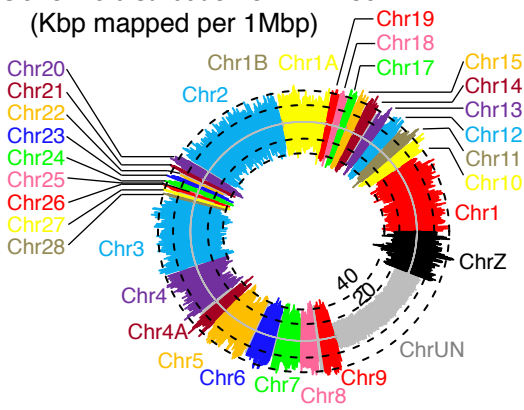

### D. Sequencing coverage and genomic coverage

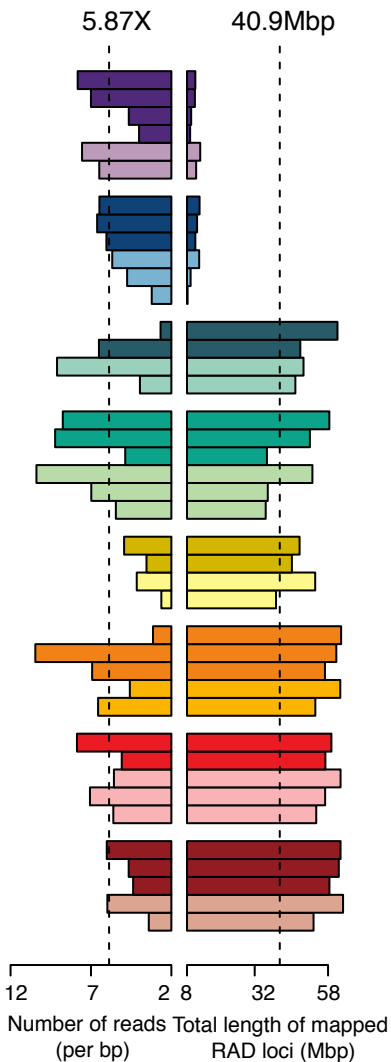

Supplement: 12862_2015_480_MOESM2_ESM.pdf [file 12862_2015_480_MOESM2_ESM.pdf]
