# Supplementary material for: Sex-linked genomic variation and its relationship to avian plumage dichromatism and sexual selection
Source: PubMed Central journal article supplement (PMC4574164; doi:10.1186/s12862-015-0480-4), 2015-09-16

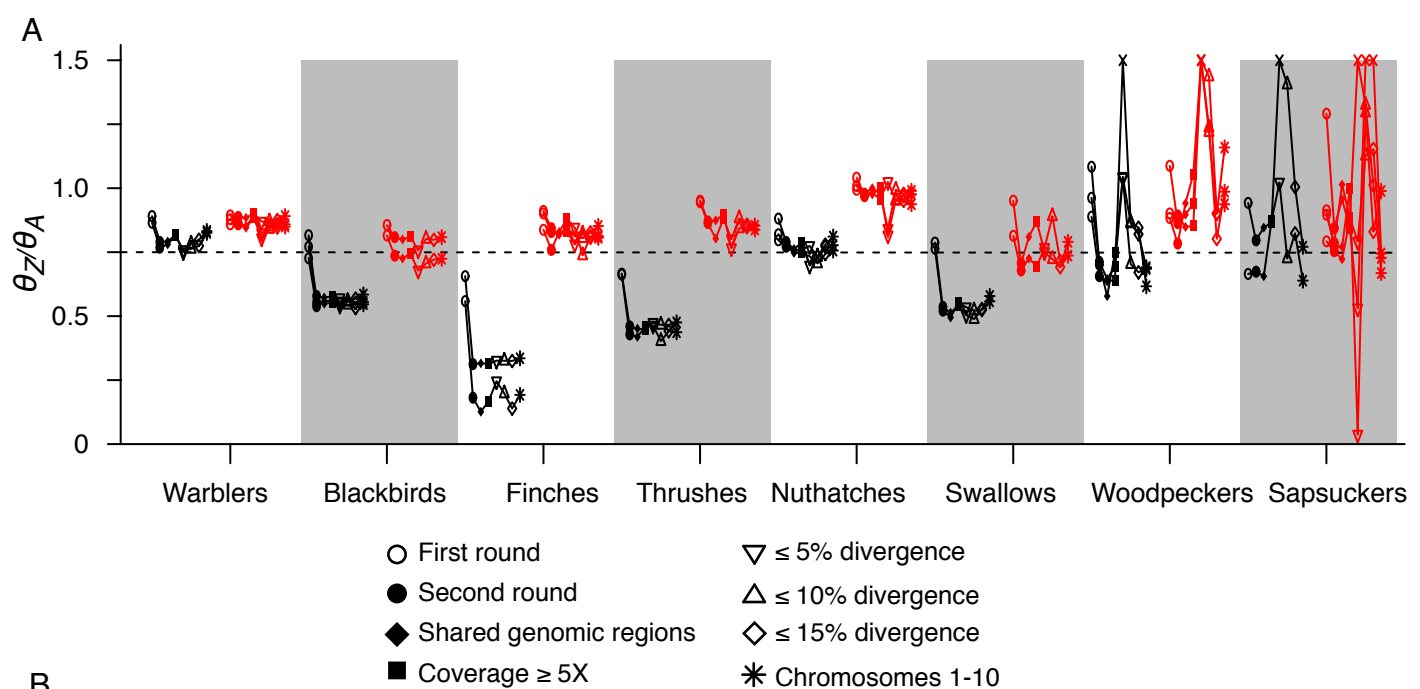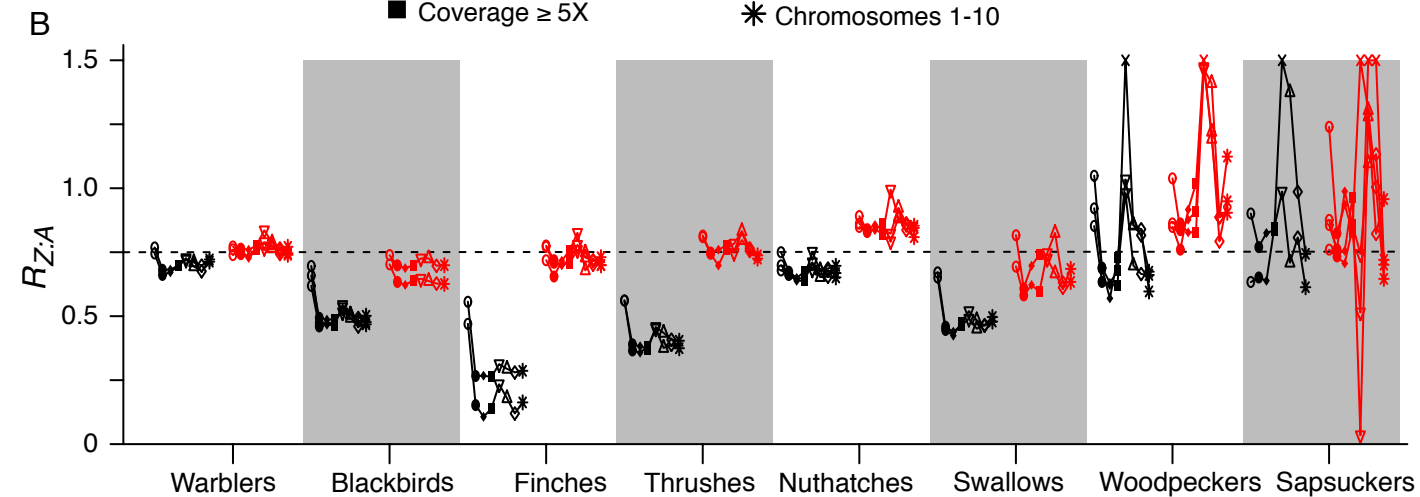

Supplement: 12862_2015_480_MOESM3_ESM.pdf [file 12862_2015_480_MOESM3_ESM.pdf]
