# Supplementary material for: Sex-linked genomic variation and its relationship to avian plumage dichromatism and sexual selection
Source: PubMed Central journal article supplement (PMC4574164; doi:10.1186/s12862-015-0480-4), 2015-09-16

Individual estimates

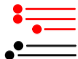

Zebra Finch  
Genome

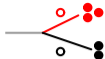

Lineage estimates

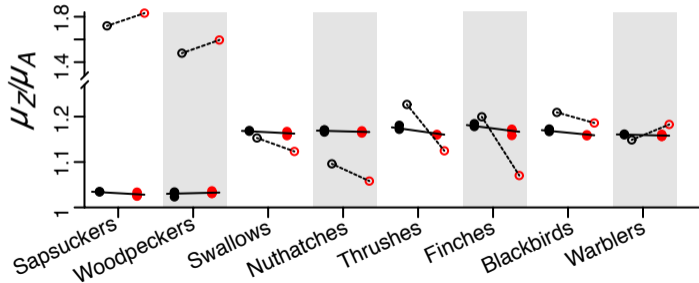

Supplement: 12862_2015_480_MOESM4_ESM.pdf [file 12862_2015_480_MOESM4_ESM.pdf]
